# Supplementary material for: Hyperspectral imaging sediment core scanning tracks high-resolution Holocene variations in (an)oxygenic phototrophic communities at Lake Cadagno, Swiss Alps
Source: Copernicus journal article supplement (doi:10.5194/egusphere-2023-151), 2023-02-06
Supplement: Supplementary file 1 [file egusphere-2023-151-supplement.pdf]

# Supplement to: Hyperspectral imaging sediment core scanning tracks high-resolution Holocene variations in (an)oxygenic phototrophic communities at Lake Cadagno, Swiss Alps

Paul D. Zander, Stefanie B. Wirth, Adrian Gilli, Sandro Peduzzi and Martin Grosjean

5 Correspondence to: Paul D. Zander ([paul.zander@mpic.de](mailto:paul.zander@mpic.de))

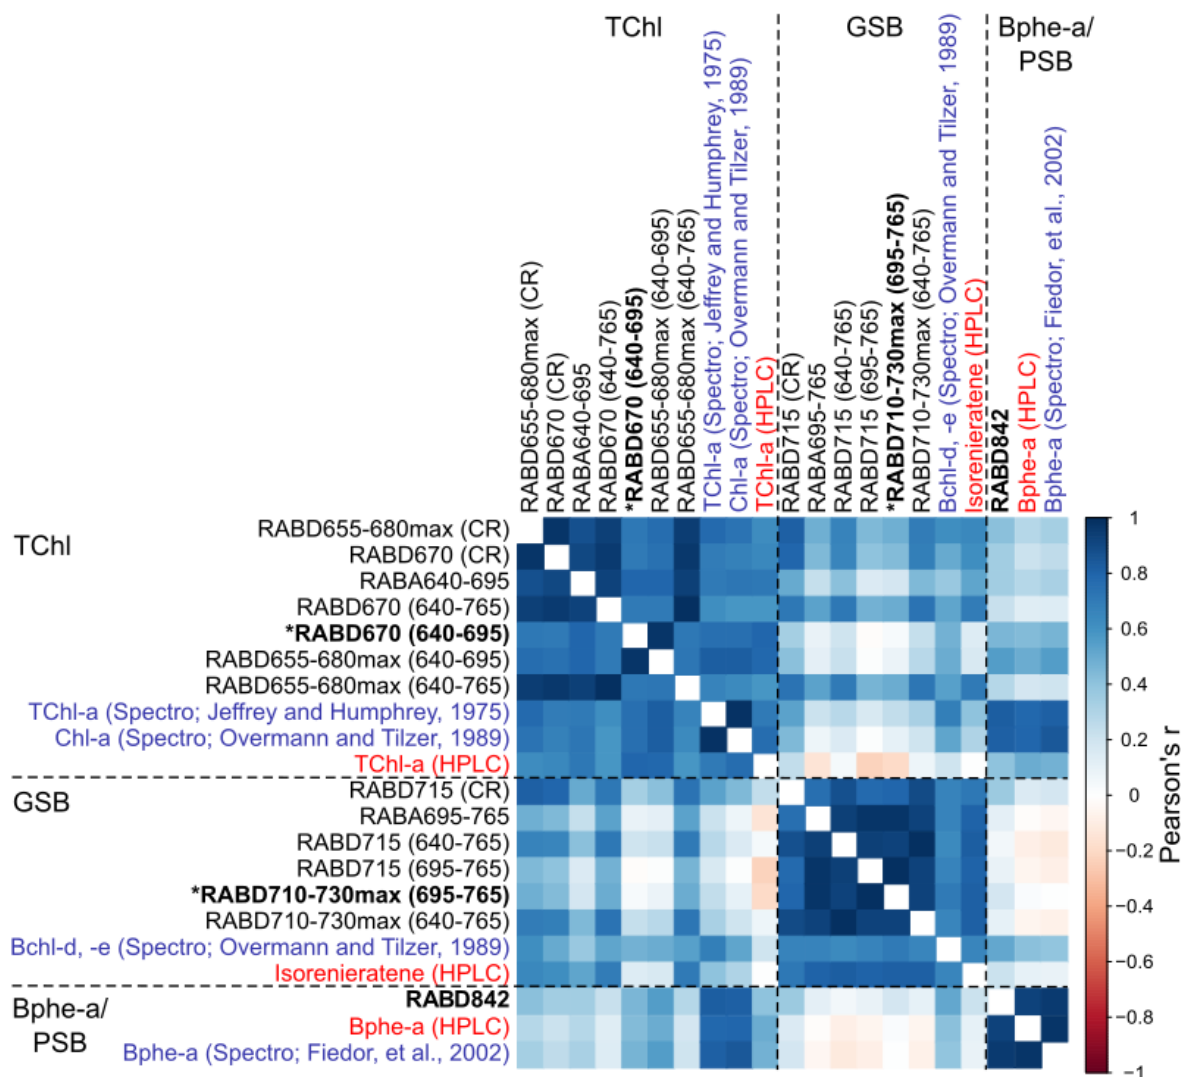

Fig: S1: Correlation matrix comparing the similarity of various HSI index formulations and pigment measurements on extracted samples (n = 21). HSI indices are labeled in black text, spectrophotometer measurements with blue text, and HPLC measurements in red text. CR = continuum removal. RABA = relative absorption band area.

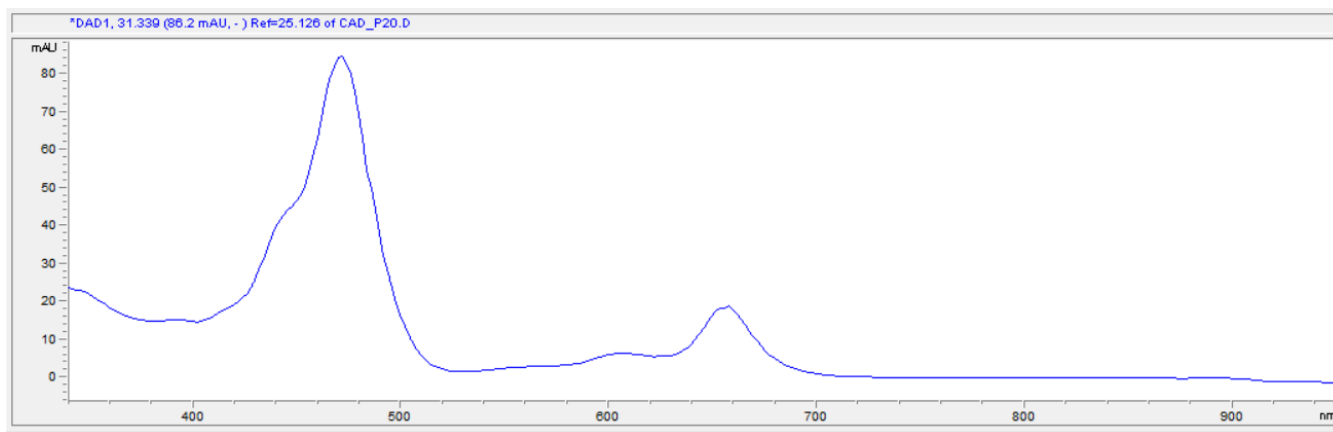

Figure S2: Absorbance spectra obtained from suspected Bphe-e (retention time = 31.4 min) in sample 20 (8.9 kyr BP).

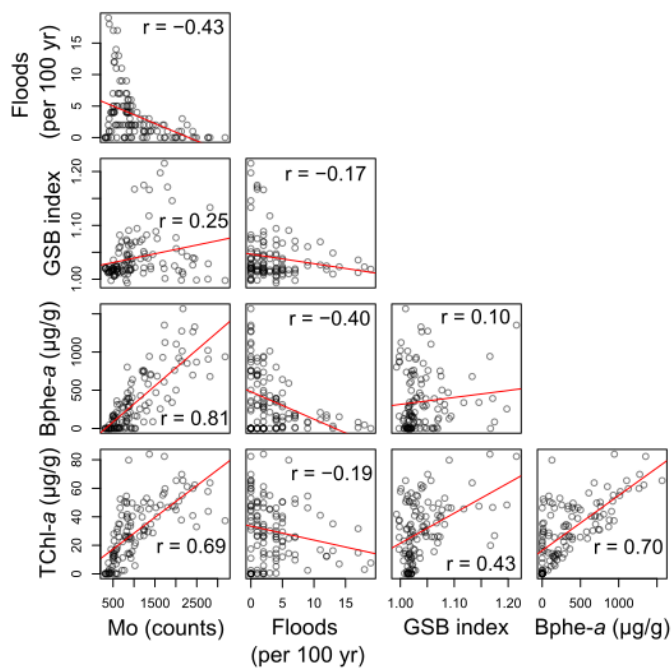

15 Figure S3: Scatterplots of relationships between selected sedimentary variables at Lago Cadagno. Each data point represents the mean of a 100-year interval ( $n = 125$ ).
